# Supplementary material
Source: PubMed Central journal article supplement (PMC3529179)
Supplement: NIHMS417607-supplement-2.pdf [file NIHMS417607-supplement-2.pdf]

## Supplemental Digital Table 1

Institutional Offices Conducting Activities in Support of Human Subject Research Not Conducted Under the Clinical and Translational Science Award, According to Part II of the Research Subject Advocacy (RSA) Taskforce Survey, 2010\*

| Activity                                                                                              | Offices providing RSA services or conducting RSA activities |                           |                              |         |                                   |         | Not conducted |
|-------------------------------------------------------------------------------------------------------|-------------------------------------------------------------|---------------------------|------------------------------|---------|-----------------------------------|---------|---------------|
|                                                                                                       | Education                                                   | Research Subject Advocate | Quality assurance/compliance | IRB     | Human research protection program | Other   |               |
| <b>Human subject research training requirements and procedures</b>                                    |                                                             |                           |                              |         |                                   |         |               |
| Orientation of investigators/staff to HSP requirements, no. (% of 42)                                 | 5 (12)                                                      | 0 (0)                     | 4 (10)                       | 8 (19)  | 20 (48)                           | 5 (12)  | 0 (0)         |
| Maintenance of institutional standard operating procedures for human subjects research, no. (% of 42) | 0 (0)                                                       | 0 (0)                     | 2 (5)                        | 12 (29) | 19 (45)                           | 7 (17)  | 2 (5)         |
| Harmonization of policies for HSP training across departments, no. (% of 41)                          | 1 (2)                                                       | 1 (2)                     | 3 (7)                        | 9 (22)  | 20 (49)                           | 3 (7)   | 4 (10)        |
| <b>Verification of human subject training certification</b>                                           |                                                             |                           |                              |         |                                   |         |               |
| Protocol-nonspecific research personnel (e.g. lab/data entry staff), no. (% of 42)                    | 1 (2)                                                       | 0 (0)                     | 1 (2)                        | 23 (55) | 10 (24)                           | 3 (7)   | 4 (10)        |
| Protocol-specific research personnel, no. (% of 42)                                                   | 1 (2)                                                       | 0 (0)                     | 0 (0)                        | 25 (60) | 11 (26)                           | 4 (10)  | 1 (2)         |
| <b>Protocol development</b>                                                                           |                                                             |                           |                              |         |                                   |         |               |
| Study design support/service, no. (% of 41)                                                           | 3 (7)                                                       | 0 (0)                     | 0 (0)                        | 6 (15)  | 1 (2)                             | 24 (59) | 7 (17)        |
| Recruitment of participants guidance, no. (% of 41)                                                   | 3 (7)                                                       | 0 (0)                     | 0 (0)                        | 11 (27) | 3 (7)                             | 18 (44) | 6 (15)        |
| Informed consent document development, no. (% of 41)                                                  | 1 (2)                                                       | 2 (5)                     | 0 (0)                        | 22 (54) | 2 (5)                             | 13 (32) | 1 (2)         |
| Informed consent process oversight, no. (% of 42)                                                     | 1 (2)                                                       | 3 (7)                     | 3 (7)                        | 20 (48) | 6 (14)                            | 6 (14)  | 3 (7)         |
| HIPAA, no. (% of 42)                                                                                  | 0 (0)                                                       | 0 (0)                     | 6 (14)                       | 21 (50) | 7 (17)                            | 8 (19)  | 0 (0)         |

|                                                                               |       |        |         |         |        |         |         |
|-------------------------------------------------------------------------------|-------|--------|---------|---------|--------|---------|---------|
| DSMP design/development, no. (% of 42)                                        | 1 (2) | 3 (7)  | 1 (2)   | 17 (40) | 2 (5)  | 10 (24) | 8 (19)  |
| <b>Protocol review</b>                                                        |       |        |         |         |        |         |         |
| Design review, no. (% of 42)                                                  | 0 (0) | 1 (2)  | 0 (0)   | 24 (57) | 5 (12) | 11 (26) | 1 (2)   |
| Recruitment plan review, no. (% of 42)                                        | 1 (2) | 1 (2)  | 0 (0)   | 22 (52) | 6 (14) | 9 (21)  | 3 (7)   |
| Informed consent process review, no. (% of 42)                                | 1 (2) | 3 (7)  | 0 (0)   | 28 (67) | 5 (12) | 3 (7)   | 2 (5)   |
| Informed consent document review, no. (% of 41)                               | 1 (2) | 2 (5)  | 3 (7)   | 27 (66) | 5 (12) | 3 (7)   | 0 (0)   |
| DSMP review, no. (% of 42)                                                    | 1 (2) | 1 (2)  | 1 (2)   | 26 (62) | 6 (14) | 5 (12)  | 2 (5)   |
| <b>Protocol implementation</b>                                                |       |        |         |         |        |         |         |
| Verification of initial IRB approval, no. (% of 41)                           | 0 (0) | 0 (0)  | 3 (7)   | 16 (39) | 4 (10) | 14 (34) | 4 (10)  |
| Verification of program readiness, no. (% of 39)                              | 0 (0) | 0 (0)  | 1 (3)   | 11 (28) | 2 (5)  | 14 (36) | 11 (28) |
| Monitoring of DSMB, no. (% of 42)                                             | 0 (0) | 1 (2)  | 1 (2)   | 23 (55) | 2 (5)  | 12 (29) | 3 (7)   |
| <b>Protocol amendment/revision tracking</b>                                   |       |        |         |         |        |         |         |
| IRB approval obtained (verify), no. (% of 40)                                 | 0 (0) | 0 (0)  | 2 (5)   | 23 (58) | 6 (15) | 8 (20)  | 1 (3)   |
| Re-consenting of participant (verify), no. (% of 39)                          | 0 (0) | 0 (0)  | 4 (10)  | 17 (44) | 4 (10) | 10 (26) | 4 (10)  |
| <b>Addressing rights/safety concerns in real time</b>                         |       |        |         |         |        |         |         |
| Real-time compliance oversight, no. (% of 42)                                 | 0 (0) | 5 (12) | 9 (21)  | 14 (33) | 5 (12) | 5 (12)  | 4 (10)  |
| Investigation of staff complaints about research conduct, no. (% of 42)       | 0 (0) | 4 (10) | 11 (26) | 14 (33) | 8 (19) | 4 (10)  | 1 (2)   |
| Investigation of participant complaints about research conduct, no. (% of 42) | 0 (0) | 5 (12) | 6 (14)  | 19 (45) | 9 (21) | 3 (7)   | 0 (0)   |
| <b>Safety and compliance monitoring</b>                                       |       |        |         |         |        |         |         |
| Monitoring of AEs tracking/reporting, no. (% of 42)                           | 0 (0) | 0 (0)  | 3 (7)   | 26 (62) | 5 (12) | 7 (17)  | 1 (2)   |
| Monitoring of DSMP execution, no. (% of 41)                                   | 0 (0) | 0 (0)  | 1 (2)   | 22 (54) | 4 (10) | 7 (17)  | 7 (17)  |
| Monitoring of IND/IDE, no. (% of 41)                                          | 1 (2) | 1 (2)  | 5 (12)  | 10 (24) | 5 (12) | 11 (27) | 8 (20)  |

|                                                               |       |       |         |         |         |        |        |
|---------------------------------------------------------------|-------|-------|---------|---------|---------|--------|--------|
| Monitoring of deviation/violation reporting, no.<br>(% of 41) | 0 (0) | 0 (0) | 3 (7)   | 26 (63) | 7 (17)  | 4 (10) | 1 (2)  |
| <b>Audits</b>                                                 |       |       |         |         |         |        |        |
| Conducts not-for cause audits, no. (% of 41)                  | 0 (0) | 1 (2) | 9 (22)  | 13 (32) | 8 (20)  | 5 (12) | 5 (12) |
| Conducts for cause audits, no. (% of 41)                      | 0 (0) | 1 (2) | 11 (27) | 14 (34) | 10 (24) | 4 (10) | 1 (2)  |

\* HSP indicates human subject protection; HIPAA, Health Insurance Portability and Accountability Act; DSMP, data safety and monitoring plan; IRB, institutional review board; DSMB, Data and Safety Monitoring Board; AE, adverse event; IND/IDE, investigational new drug/investigational device exemption. Education was not assessed for activities not under the Clinical and Translational Science Award so it is not included here.
